# Supplementary material
Source: PubMed Central journal article supplement (PMC6858832)
Supplement: NIHMS1057140-supplement-Appendix.pdf [file NIHMS1057140-supplement-Appendix.pdf]

APPENDIX 1: General Wishes Statements

| Item # | Wish statements                                                                                                                                                                                                                                                                                                                                                                                                                                                                                                                                                                                  |
|--------|--------------------------------------------------------------------------------------------------------------------------------------------------------------------------------------------------------------------------------------------------------------------------------------------------------------------------------------------------------------------------------------------------------------------------------------------------------------------------------------------------------------------------------------------------------------------------------------------------|
| 1.     | <p>I cherish my life regardless of its quality. I would want any and all medical treatments that might prolong my life, even if the result is a quality of life that others regard as very poor. This means that I want all treatments:</p> <ul style="list-style-type: none"> <li>• Even if treatment would prolong my life by only hours or days</li> <li>• Even if their chance of success is very low</li> <li>• Regardless of the cost of treatment</li> <li>• Regardless of the burden of treatment on me or others</li> </ul>                                                             |
| 2.     | <p>I cherish my life regardless of its quality. I would want all medical treatments that are likely to prolong my life, unless my family and loved ones would consider the burden to them to be unbearable. This means that I want all treatments:</p> <ul style="list-style-type: none"> <li>• Even if the result is a quality of life that others regard as very poor</li> <li>• Even if treatment would prolong my life by only hours or days</li> </ul>                                                                                                                                      |
| 3.     | <p>I cherish my life, so long as my quality of life is acceptable. I want only those medical treatments that are likely to be successful in preserving what I consider a good quality of life. This means that if my quality of life is likely to be poor, I would rather live a shorter period of time than undergo medical treatments that prolong my life. For me, an unacceptably poor quality of life means:</p> <ul style="list-style-type: none"> <li>• (list of conditions/experiences drawn from user’s responses to the program)<sup>1</sup></li> </ul>                                |
| 4.     | <p>I cherish my life, so long as my quality of life is acceptable <i>and efforts to prolong it do not impose on my family and loved ones a burden they consider to be unbearable</i>. I want only those medical treatments that would not impose such a burden and are likely to preserve what I consider a good quality of life – even if this means I would live a shorter period of time. For me, an unacceptably poor quality of life means:</p> <ul style="list-style-type: none"> <li>• (list of conditions/experiences drawn from user’s responses to the program)<sup>1</sup></li> </ul> |
| 5.     | <p>I do not want any medical treatments that would prolong my life, unless the purpose of the treatments is to help other people, such as:</p> <ul style="list-style-type: none"> <li>• To make organ donation possible</li> <li>• To use my body for research or education</li> <li>• To allow family or friends to say goodbye to me</li> </ul>                                                                                                                                                                                                                                                |

|    |                                                                                                                                                                                                                                                                                                                                                                                                           |
|----|-----------------------------------------------------------------------------------------------------------------------------------------------------------------------------------------------------------------------------------------------------------------------------------------------------------------------------------------------------------------------------------------------------------|
| 6. | <p>I do not want any medical treatments that would prolong my life, even if the treatments would:</p> <ul style="list-style-type: none"><li>• Return me to my current state of health</li><li>• Decrease my discomfort</li><li>• Have a high probability of success</li><li>• Impose minimal burden on me or on others</li><li>• Benefit others (such as organ donation, research or education)</li></ul> |
|----|-----------------------------------------------------------------------------------------------------------------------------------------------------------------------------------------------------------------------------------------------------------------------------------------------------------------------------------------------------------------------------------------------------------|

<sup>1</sup> Statements #3 and #4 are populated with bullet points drawn from the user's responses to the quality of life section that is completed earlier in the program.
